# Supplementary material for: Combining biomedical knowledge graphs and text to improve predictions for drug-target interactions and drug-indications
Source: PeerJ journal article supplement (doi:10.7717/peerj.13061), 2022-04-04
Supplement: Supplementary.pdf [file Supplementary.pdf]

# Supplementary materials: Combining Biomedical Knowledge Graphs and Text to Improve Predictions for Drug-Target Interactions and Drug-Indications

Mona Alshahrani, Abdullah Almansour, Asma Alkhalidi, Maha Thafar, Mahmut Uludag, Magbubah Essack, and Robert Hoehndorf

| Number of walks | 50    | 100   | 150   |
|-----------------|-------|-------|-------|
| Walks lengths   |       |       |       |
| 5               | 0.889 | 0.891 | 0.895 |
| 10              | 0.882 | 0.885 | 0.883 |
| 15              | 0.879 | 0.879 | 0.878 |
| 20              | 0.883 | 0.881 | 0.881 |

Table 1: AUROC results for prediction of drug indications based on the knowledge graph corpus while varying then number of walks and walks lengths.

| Hidden Units            | 32    | 64    | 128   | 256   | 512   |
|-------------------------|-------|-------|-------|-------|-------|
| One layer               |       |       |       |       |       |
| Knowledge graph         | 0.874 | 0.876 | 0.878 | 0.880 | 0.882 |
| Pubmed abstracts        | 0.867 | 0.876 | 0.877 | 0.880 | 0.883 |
| Concatenated embeddings | 0.887 | 0.893 | 0.898 | 0.901 | 0.899 |
| Concatenated corpus     | 0.879 | 0.879 | 0.890 | 0.896 | 0.897 |
| Hidden Units            | 32    | 64    | 128   | 256   | 512   |
| Two layers              |       |       |       |       |       |
| Knowledge graph         | 0.868 | 0.875 | 0.878 | 0.882 | 0.882 |
| Pubmed abstracts        | 0.866 | 0.874 | 0.878 | 0.877 | 0.877 |
| Concatenated embeddings | 0.888 | 0.895 | 0.899 | 0.901 | 0.895 |
| Concatenated corpus     | 0.879 | 0.882 | 0.888 | 0.889 | 0.879 |

Table 2: AUROC results for prediction of drug targets with different embeddings methods and neural network architectures.

| Hidden Units            | 32    | 64    | 128   | 256   | 512   |
|-------------------------|-------|-------|-------|-------|-------|
| One layer               |       |       |       |       |       |
| Knowledge graph         | 0.869 | 0.875 | 0.881 | 0.883 | 0.888 |
| Pubmed abstracts        | 0.909 | 0.919 | 0.928 | 0.927 | 0.929 |
| Concatenated embeddings | 0.903 | 0.909 | 0.913 | 0.916 | 0.914 |
| Concatenated corpus     | 0.914 | 0.921 | 0.924 | 0.929 | 0.932 |
| Two layers              |       |       |       |       |       |
| Knowledge graph         | 0.862 | 0.862 | 0.874 | 0.876 | 0.885 |
| Pubmed abstracts        | 0.899 | 0.904 | 0.921 | 0.924 | 0.920 |
| Concatenated embeddings | 0.898 | 0.905 | 0.912 | 0.910 | 0.918 |
| Concatenated corpus     | 0.897 | 0.909 | 0.920 | 0.920 | 0.918 |

Table 3: AUROC results for prediction of drug indications with different embeddings methods and neural network architectures.

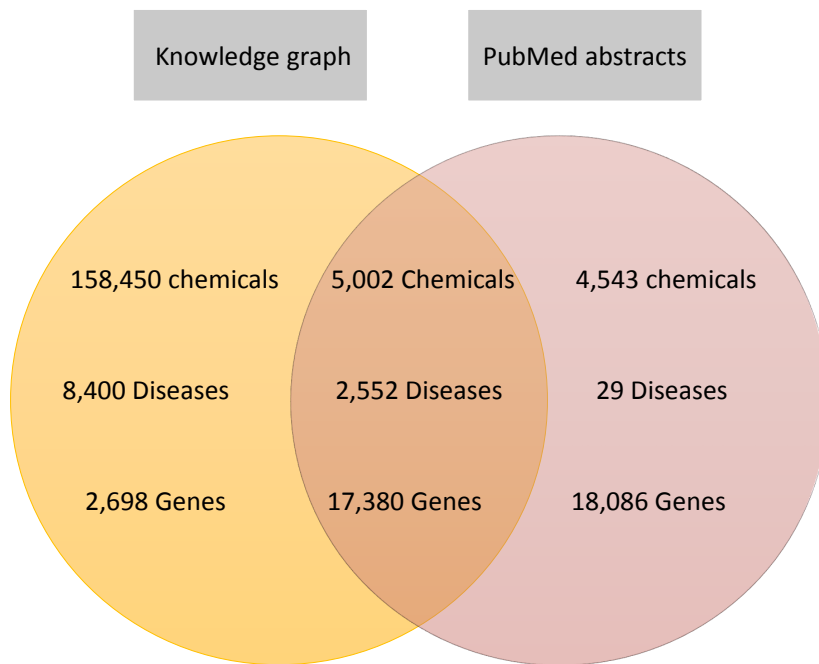

Figure 1: Overlap between entities recognized in text and contained in our knowledge graph.

| Source                                     | # of drugs | # of genes | # of DTIs |
|--------------------------------------------|------------|------------|-----------|
| Knowledge graph                            | 1,466      | 20,068     |           |
| MEDLINE (PubTator) corpus                  | 9,545      | 35,466     |           |
| Knowledge Graph and PubMed                 | 932        | 17,380     |           |
| Evaluation set (STITCH)                    | 98,567     | 9,782      | 432,512   |
| Knowledge Graph, PubMed and evaluation set | 820        | 7,201      | 40,862    |

Table 4: The number of drugs, genes, and their associations in our knowledge graph (after removing *has-target edges*), MEDLINE abstracts in the PubTator corpus, in the evaluation set, and the overlap between all resources.

| Source                                     | # of drugs | # of diseases | # of associations |
|--------------------------------------------|------------|---------------|-------------------|
| Knowledge graph                            | 163,420    | 10,952        |                   |
| MEDLINE (PubTator) corpus                  | 9,545      | 2,581         |                   |
| Knowledge Graph and PubMed                 | 4,993      | 2,552         |                   |
| Evaluation set (SIDER indications)         | 1,224      | 871           | 6,704             |
| Knowledge Graph, PubMed and evaluation set | 754        | 664           | 3,977             |

Table 5: The number of drugs, diseases, and their associations in our knowledge graph (after removing *has-indication edges*), MEDLINE abstracts in the PubTator corpus, in the evaluation set, and the overlap between all resources.

|                         | drug-targets | drug-indications |
|-------------------------|--------------|------------------|
| PubMed Abstracts        | 0.868        | 0.904            |
| Concatenated embeddings | 0.898        | 0.927            |
| Concatenated corpus     | 0.866        | 0.903            |

Table 6: AUROC results for prediction of drug targets and drug indications after explicitly removing all the abstract that contain co-occurrences.

Table 7: Performance results for predicting drug–target associations, based on our five embeddings approaches and using three classification models (Artificial Neural Networks (ANN), Random Forest (RF) and Logistic regression (LR)).

| <b>Model</b> | <b>Embedding Method</b>           | <b>ROCAUC</b> | <b>Average recall @100</b> | <b>Average Rec</b> |
|--------------|-----------------------------------|---------------|----------------------------|--------------------|
| <b>ANN</b>   | Knowledge graph (Walking RDF/OWL) | 0.882         | 0.37                       | 0.09               |
|              | Knowledge graph (TransE)          | 0.873         | 0.31                       | 0.04               |
|              | PubMed abstracts                  | 0.883         | 0.47                       | 0.14               |
|              | Concatenated embeddings           | 0.901         | 0.49                       | 0.14               |
|              | Concatenated corpus               | 0.897         | 0.50                       | 0.14               |
| <b>RF</b>    | Knowledge graph (Walking RDF/OWL) | 0.860         | 0.36                       | 0.08               |
|              | Knowledge graph (TransE)          | 0.859         | 0.31                       | 0.05               |
|              | PubMed abstracts                  | 0.852         | 0.49                       | 0.18               |
|              | Concatenated embeddings           | 0.867         | 0.45                       | 0.13               |
|              | Concatenated corpus               | 0.879         | 0.51                       | 0.18               |
| <b>LR</b>    | Knowledge graph (Walking RDF/OWL) | 0.840         | 0.11                       | 0.03               |
|              | Knowledge graph (TransE)          | 0.829         | 0.11                       | 0.02               |
|              | PubMed abstracts                  | 0.832         | 0.21                       | 0.05               |
|              | Concatenated embeddings           | 0.858         | 0.23                       | 0.07               |
|              | Concatenated corpus               | 0.841         | 0.22                       | 0.06               |

Table 8: Prediction performance for drug-disease associations linked by indications, based on five approaches, using three classification models (Artificial Neural Networks (ANN), Random Forest (RF) and Logistic regression (LR)).

| <b>Model</b> | <b>Embedding Method</b>           | <b>ROCAUC</b> | <b>Average recall@100</b> | <b>Average recal</b> |
|--------------|-----------------------------------|---------------|---------------------------|----------------------|
| <b>ANN</b>   | Knowledge graph (Walking RDF/OWL) | 0.888         | 0.47                      | 0.12                 |
|              | Knowledge graph (TransE)          | 0.866         | 0.38                      | 0.05                 |
|              | PubMed abstracts                  | 0.928         | 0.63                      | 0.26                 |
|              | Concatenated embeddings           | 0.916         | 0.61                      | 0.23                 |
|              | Concatenated corpus               | 0.932         | 0.64                      | 0.25                 |
| <b>RF</b>    | Knowledge graph (Walking RDF/OWL) | 0.895         | 0.44                      | 0.13                 |
|              | Knowledge graph (TransE)          | 0.888         | 0.43                      | 0.11                 |
|              | PubMed abstracts                  | 0.912         | 0.61                      | 0.24                 |
|              | Concatenated embeddings           | 0.908         | 0.54                      | 0.17                 |
|              | Concatenated corpus               | 0.918         | 0.60                      | 0.22                 |
| <b>LR</b>    | Knowledge graph (Walking RDF/OWL) | 0.842         | 0.30                      | 0.06                 |
|              | Knowledge graph (TransE)          | 0.836         | 0.31                      | 0.03                 |
|              | PubMed abstracts                  | 0.846         | 0.40                      | 0.11                 |
|              | Concatenated embeddings           | 0.862         | 0.39                      | 0.09                 |
|              | Concatenated corpus               | 0.858         | 0.39                      | 0.12                 |

| Drug                            | Target (Entrez ID) | Knowledge graph | PubMed abstracts | Concatenated embeddings | Concatenated corpus |
|---------------------------------|--------------------|-----------------|------------------|-------------------------|---------------------|
| Megestrol acetate (CID00004048) | 2908               | ranked 13       | ranked 10        | ranked 6                | <b>ranked 4</b>     |
| Proprantheline (CID00004934)    | 1131               | ranked 91       | ranked 13        | <b>ranked 1</b>         | <b>ranked 1</b>     |
| Dothiepin (CID00003155)         | 1129               | ranked 62       | ranked 26        | ranked 19               | <b>ranked 1</b>     |
| Paclitaxel (CID00004666)        | 7157               | ranked 5        | ranked 3         | ranked 5                | <b>ranked 2</b>     |
| Cortisol (CID00003640)          | 1551               | ranked 13       | ranked 20        | <b>ranked 3</b>         | ranked 10           |
| Omeprazole (CID00004594)        | 1544               | ranked 53       | ranked 18        | ranked 7                | <b>ranked 2</b>     |

Table 9: The predicted ranks of different embeddings approaches in drug-target predictions

| Drug                      | Indication                                    | Knowledge graph | PubMed abstracts | Concatenated embeddings | Concatenated corpus |
|---------------------------|-----------------------------------------------|-----------------|------------------|-------------------------|---------------------|
| Cetirizine (CID00002678)  | allergic hypersensitivity disease (DOID:1205) | ranked 34       | ranked 4         | <b>ranked 1</b>         | ranked 10           |
| Etoposide (CID00003310)   | leukemia (DOID:1240)                          | ranked 177      | ranked 3         | ranked 11               | <b>ranked 1</b>     |
| Ramiprilat (CID05464096)  | cerebrovascular disease (DOID:6713)           | ranked 76       | <b>ranked 1</b>  | <b>ranked 1</b>         | ranked 3            |
| Clindamycin (CID00002786) | impetigo (DOID:8504)                          | ranked 16       | ranked 11        | <b>ranked 1</b>         | <b>ranked 1</b>     |
| Cefuroxime (CID00002658)  | pneumonia (DOID:552)                          | ranked 46       | ranked 7         | ranked 3                | <b>ranked 1</b>     |
| Metformin (CID00004091)   | diabetes mellitus (DOID:9351)                 | ranked 3        | ranked 6         | <b>ranked 1</b>         | ranked 3            |

Table 10: The predicted ranks of different embeddings approaches in drug-indication predictions
